# Supplementary material for: High performance H2 evolution realized in 20 μm-thin silicon nanostructured photocathodes
Source: Royal Society of Chemistry journal article supplement (doi:10.1039/c5ta00156k), 2015-01-01
Supplement: c5ta00156k1.pdf [file c5ta00156k1.pdf]

## Supporting Information

# High Performance H<sub>2</sub> Evolution Realized in 20-μm-thin Silicon Nanostructured Photocathode

*Jin-Young Jung, Min-Joon Park, Xiaopeng Li, Jong-Ho Kim, Ralf B. Wehrspohn\*, and Jung-Ho Lee\**

<sup>a</sup>Departments of Chemical Engineering, Hanyang University, 55 Hanyangdaehak-ro, Sangnok-gu, Ansan, Kyeonggi-do 426-791, Republic of Korea

<sup>b</sup>Max-Planck Institute of Microstructure Physics Weinberg 2, D-06120 Halle, Germany Institute of Physics, Martin-Luther-Universität Halle-Wittenberg, D-06099 Halle, Germany

Email: [jungho@hanyang.ac.kr](mailto:jungho@hanyang.ac.kr)

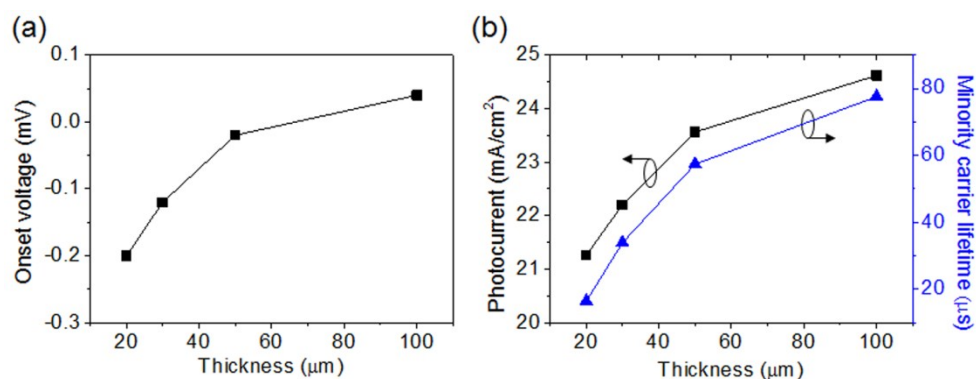

**Figure S1.** (a) Onset voltage ( $V_{ph}$ ) for planar Si as a function of substrate thickness ( $W$ ). (b) Saturated photocurrent density ( $J_{ph}$ ) and effective minority carrier lifetime ( $\tau_{eff}$ ). Generally,  $\tau_{eff}$  is expressed as follows:  $1/\tau_{eff} = 1/\tau_{bulk} + 1/\tau_{surf}$ , where  $\tau_{bulk}$  is the bulk minority carrier lifetime.

Assuming that the  $\tau_{bulk}$  value ( $\sim 1$  ms for our silicon wafers) is negligible,  $\tau_{eff}$  can be approximated as  $\tau_{surf}$ , i.e.,  $\tau_{eff} \approx \tau_{surf}$ .

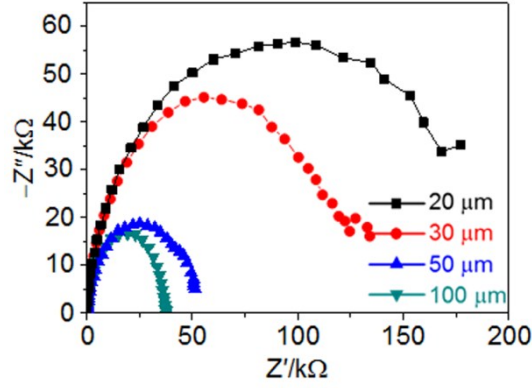

**Figure S2.** Nyquist plot of impedance spectroscopy data for planar Si as a function of thickness (W) at 20  $\mu\text{m}$  (black), 30  $\mu\text{m}$  (red), and 50  $\mu\text{m}$  (blue), and 100  $\mu\text{m}$  (cyan).

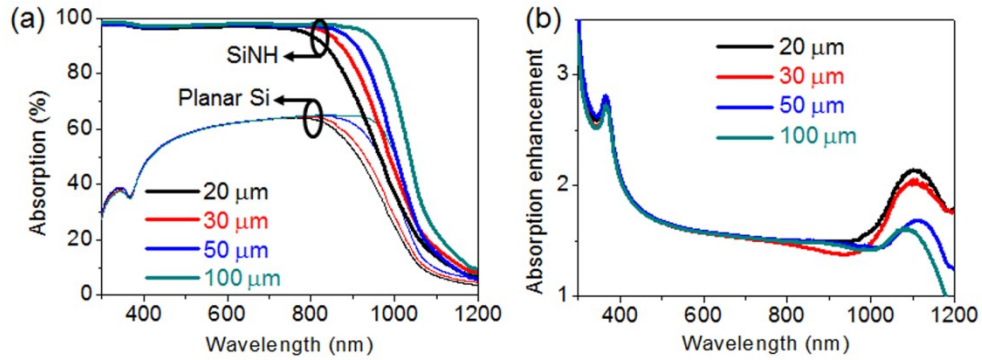

**Figure S3.** (a) Light absorption spectra and of Si NH (thick lines) and planar Si (thin lines) for various W values of 20, 30, 50, and 100  $\mu\text{m}$ . (b) The absorption enhancement spectra of tapered SiNH with varying W. Tapered Si NH structures exhibit a gradual change of effective refractive indexes, which act as antireflective dielectric multilayers delivering superior broadband anti-reflectance.

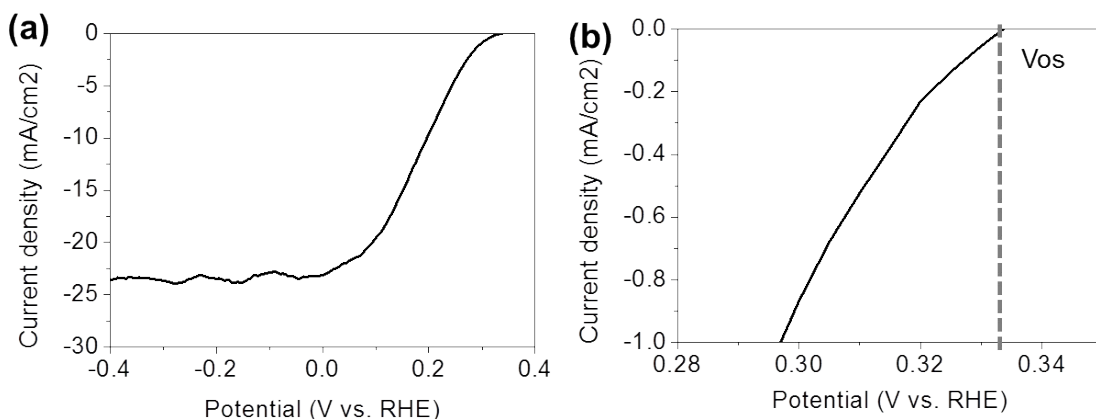

**Figure S4.** (a) J-V curve of Pt NPs/Si NHs photocathodes (20 μm-thick) and (b) magnification of J-V curve around the 0-1 mA/cm² photocurrent.

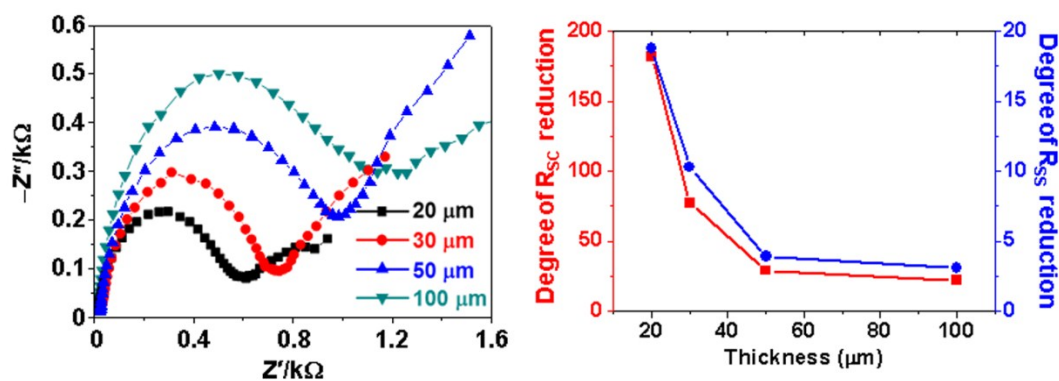

**Figure S5.** (a) Nyquist plots of impedance spectroscopy data for Pt NPs-planar Si as a function of W. (b) The overall amount of R<sub>sc</sub> and R<sub>ss</sub> reduction for planar Si after coating Pt NPs. The greatest reduction in charge transfer resistance was observed for the thinnest planar Si.

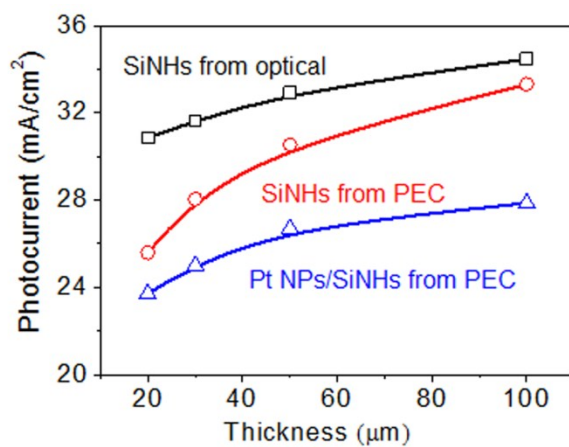

**Figure S6.** Saturated photocurrent values measured as a function of wafer thickness in the saturated region (1.5 V vs. RHE) of SiNHs and Pt NPs/SiNHs.

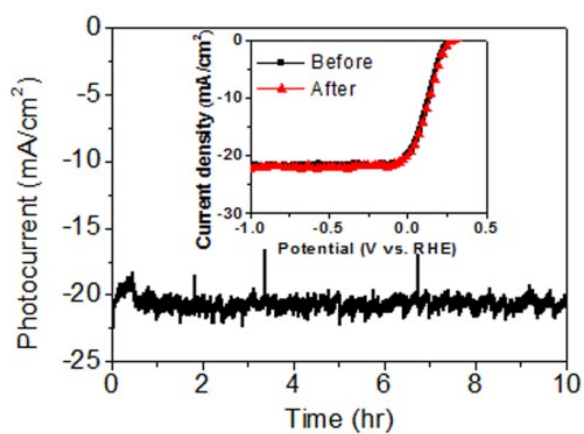

**Figure S7.** Long-term stability test of 20-μm-thin Si photocathode employing Pt/Si NHs at 0 V vs. RHE. Insets show J-V curves before and after the 10 hr stability test.

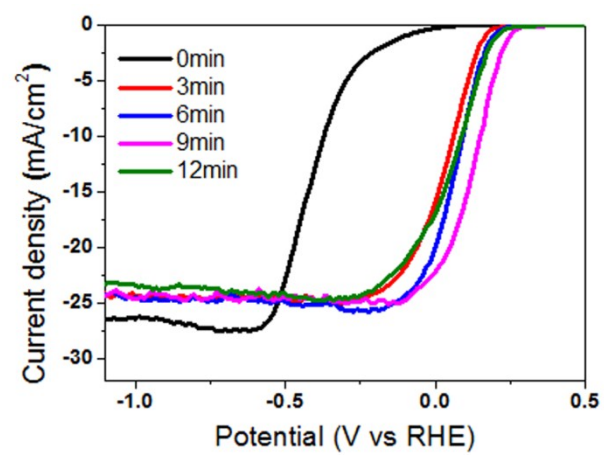

**Figure S8.** J-V curve of SiNH photocathode as a function of Pt deposition time.
